# Supplementary material for: Testing the Münch hypothesis of long distance phloem transport in plants
Source: eLife. 2016 Jun 2;5:e15341. doi: 10.7554/eLife.15341 (PMC4946904; doi:10.7554/eLife.15341)
Supplement: Figure 1—source data 1. — DOI: http://dx.doi.org/10.7554/eLife.15341.004 [file elife-15341-fig1-data1.xlsx]

## Sheet: 2014_07_18_SievePlateData.csv
																										PI
																										3.14159
Small foliated morning glory
ID	location on axis (m)	SE RADIUS	SE RADIUS ERROR	SE LENGTH	SE LENGTH ERROR	PORE RADIUS	PORE RADIUS ERROR	SIEVE PORE NO	SIEVE PORE NO ERROR	PLATE THICKNESS	CONDUCTIVITY (Eq. 27 or 31)			Pore parameter A	Pore parameter B	Pore parameter M3	Pore Parameter M4	Pore parameter 1/IAB	Covering fraction N rp^2/r^2	Lumen conductivity r^2/8	rp*l		conducting area	location (m)	pixel	mm2
																							MG Pullman 2	1	461714	4.23853
																							ext	4	446019	4.09445
MG Pullman 1	1	12.88	2.03	225.5	48	0.46	0.12	191	31	1	1.18789			1.84528	0.26087	1.20416	1.42221	2.12793	0.243622	20.7368	103.73			7	148348	1.36183
ext	4	14.6	1.97	259.55	53	0.39	0.11	210	50	1	0.693011			2.17648	0.282051	1.23866	1.4963	2.2619	0.149845	26.645	101.225
	7	9.83	1.17	393.05	61	0.355	0.08	132	27	1	0.878685			2.39106	0.225352	1.15235	1.31244	2.68964	0.172157	12.0786	139.533
																							MG Pullman 2	1	140501	1.2898
																							int	4	291271	2.67387
MG Pullman 1	1	13.83	2.1	178.45	36	0.6	0.15	169	39	1	1.79475			1.41471	0.25	1.1875	1.38672	1.86229	0.318086	23.9086	107.07			7	199584	1.83218
int	4	19.71	2.85	193.9	37	0.57	0.12	209	46	1	0.978061			1.48917	0.210526	1.13296	1.27182	2.05354	0.174792	48.5605	110.523
	7	10.67	2.3	303.58	55	0.285	0.08	155	42	1	0.352836			2.97834	0.280702	1.23638	1.49139	2.80584	0.110584	14.2311	86.5203
