# Supplementary material for: Testing the Münch hypothesis of long distance phloem transport in plants
Source: eLife. 2016 Jun 2;5:e15341. doi: 10.7554/eLife.15341 (PMC4946904; doi:10.7554/eLife.15341)
Supplement: Figure 3—source data 1. — DOI: http://dx.doi.org/10.7554/eLife.15341.012 [file elife-15341-fig3-data1.xlsx]

## Sheet: 2014_07_18_SievePlateData.csv
ID	location on axis (m)	SE RADIUS	SE RADIUS ERROR	SE LENGTH	SE LENGTH ERROR	PORE RADIUS	PORE RADIUS ERROR	SIEVE PORE NO	SIEVE PORE NO ERROR	PLATE THICKNESS	CONDUCTIVITY (Eq. 27 or 31)			Pore parameter A	Pore parameter B	Pore parameter M3	Pore Parameter M4	Pore parameter 1/IAB	Covering fraction N rp^2/r^2	Lumen conductivity r^2/8	rp*l					PI
																										3.14159
Large partially defioliated morning glory																										Conducting area
MG Harv For ext	0	11.2	2.76	242.8	63.68	0.715128	0.194789	163.145	53.21	1	5.08138			1.18696	0.272383	1.22258	1.46167	1.63	0.665127	15.68	173.633					ext	pixel	mm2
MG Harv For ext	1	13.02	2.4	245.18	60	0.749013	0.120282	201.774	45.06	1	5.15928			1.13326	0.160587	1.07736	1.15672	1.90791	0.66776	21.19	183.643					0m	866361	7.95319
MG Harv For ext	2	11.7	1.59	259.714	53.89	0.774753	0.128875	205	44.47	1	6.43418			1.09561	0.166344	1.08301	1.16832	1.86112	0.898895	17.1112	201.214					1m	603850	5.54334
MG Harv For ext	3	11.16	2.79	266.743	65.86	0.724615	0.166293	190.626	51.46	1	5.87207			1.17142	0.229491	1.158	1.32432	1.7481	0.803652	15.5682	193.286					2m	530194	4.86718
MG Harv For ext	4	11.89	1.95	269.857	54.15	0.723808	0.136629	211.697	33.86	1	5.83453			1.17272	0.188764	1.1069	1.2176	1.86657	0.784509	17.6715	195.325					3m	561259	5.15236
MG Harv For ext	5	12.36	1.77	296.747	69.04	0.749157	0.181713	187.954	39.13	1	6.42767			1.13304	0.242557	1.1765	1.36339	1.68103	0.690494	19.0962	222.31					4m	561524	5.15479
MG Harv For ext	6	13.11	2.92	263.455	49.67	0.74532	0.151311	186.673	40.26	1	5.2718			1.13888	0.203015	1.12365	1.25239	1.79933	0.603341	21.484	196.358					5m	609048	5.59106
MG Harv For ext	7	12.62	2.23	297.385	77.28	0.715866	0.138306	200.964	53.55	1	5.62117			1.18573	0.1932	1.11198	1.22814	1.86477	0.646642	19.908	212.888					6m	654214	6.00568
MG Harv For ext	8	13.62	2.31	271.542	43.3	0.688037	0.141647	195.596	73.39	1	4.3147			1.23369	0.205871	1.12715	1.25969	1.86656	0.499149	23.188	186.831					7m	659475	6.05398
MG Harv For ext	9	13.3	2.13	293.355	46.17	0.731727	0.1289	206.524	45.77	1	5.61793			1.16003	0.176158	1.0931	1.18908	1.89041	0.625122	22.1113	214.656					8m	630288	5.78604
MG Harv For ext	10	12.48	2.19	257.811	61.12	0.700049	0.147167	180.339	30.7	1	4.53693			1.21253	0.210223	1.13258	1.27102	1.83692	0.567436	19.4688	180.48					9m	607902	5.58054
MG Harv For ext	11	14	2.35	274.636	54.77	0.710831	0.122081	223.318	61.05	1	4.93217			1.19413	0.171744	1.08849	1.17959	1.93104	0.575704	24.5	195.22					10m	553529	5.0814
MG Harv For ext	12	14.91	3.15	319.143	64.09	0.7544	0.133732	211.782	54.15	1	5.87721			1.12517	0.17727	1.09427	1.19151	1.85817	0.542172	27.7885	240.761					11m	522622	4.79767
MG Harv For ext	13	14.08	1.89	312.546	94.23	0.763409	0.142762	208.807	30.75	1	6.34701			1.11189	0.187006	1.10491	1.2135	1.82132	0.61384	24.7808	238.6					12m	489764	4.49603
MG Harv For ext	14	14.3	3.47	280	60	0.72961	0.151924	174.987	38.1	1	4.50807			1.1634	0.208226	1.13007	1.26579	1.80401	0.455528	25.5613	204.291					13m	492677	4.52277
MG Harv For ext	15	13.84	2.34	217.88	48.8	0.689865	0.118685	185.39	47.7	1	3.23927			1.23043	0.172041	1.08879	1.18022	1.96099	0.460619	23.9432	150.308					14m	1504473	3.33151
MG Harv For ext	16	11.07	3	231.941	52.37	0.652899	0.173145	163.395	33.59	1	3.92488			1.30009	0.265194	1.21098	1.4368	1.73062	0.568375	15.3181	151.434					15m	714861	3.69226
MG Harv For ext	17	9.06	2.9	241.419	57.39	0.54528	0.129651	140.652	41.49	1	2.63303			1.55668	0.237769	1.1696	1.34879	2.00912	0.509483	10.2605	131.641					16m	397481	3.64888
MG Harv For ext	17.4	8.07	1.44	not extractable		0.488568	0.088789	123.362	31.39	1				1.73738	0.181733	1.09908	1.20143	2.35594	0.452153	8.14061	#VALUE!					17m	147820	1.35699
MG Harv For ext	17.7																									17.4m
																										int	pixel	mm2
MG Harv For int	0	6.73	1.24	151.443	28.43	0.611183	0.159413	81.6519	21.47	1	2.22283			1.38883	0.260827	1.20409	1.42207	1.80712	0.67341	5.66161	92.5594					0m	49671	0.45598
MG Harv For int	1	7.82	1.71	181.55		0.577404	0.156033	106.471	25.18	1	2.41279			1.47007	0.270232	1.21908	1.45415	1.83124	0.580466	7.64405	104.828					1m	39935	0.366603
MG Harv For int	2	8.54	1.75	134.706	29.6	0.603012	0.141901	122.007	22.44	1	2.11235			1.40765	0.235321	1.16613	1.34146	1.90688	0.608304	9.11645	81.2293					2m	33267	0.305391
MG Harv For int	3	8.9	1.6	116.797	21.85	0.633126	0.179024	122.466	29	1	2.21824			1.34069	0.282762	1.23986	1.4989	1.70099	0.619751	9.90125	73.9475					3m	49825	0.457394
MG Harv For int	4	9.58	2.38	144.581	38.34	0.698332	0.156987	126.73	45.96	1	2.97554			1.21551	0.224803	1.15161	1.31088	1.7956	0.673397	11.472	100.966					4m	66287	0.608515
MG Harv For int	5	9.44	1.37	108.168	31.55	0.624567	0.157351	127.108	23.16	1	1.83476			1.35906	0.251936	1.19042	1.39292	1.81574	0.556402	11.1392	67.5585					5m	81200	0.745416
MG Harv For int	6	10.28	1.93	143.875	33.79	0.629784	0.153209	140.471	35.34	1	2.28326			1.34781	0.243272	1.17754	1.36559	1.8362	0.527209	13.2098	90.6101					6m	56364	0.517422
MG Harv For int	7	10.16	2.3	169.538	60.18	0.688978	0.152653	137.106	36.48	1	3.22415			1.23201	0.221565	1.14727	1.30177	1.81804	0.630493	12.9032	116.808					7m	80045	0.734813
MG Harv For int	8	10.7	2.66	172.486	59.41	0.662306	0.200252	143.119	50.32	1	3.22072			1.28162	0.302356	1.27426	1.57359	1.59923	0.548336	14.3112	114.239					8m	85931	0.788847
MG Harv For int	9	11.01	2.38	135.807	38.62	0.744758	0.165213	150.91	42.77	1	3.31497			1.13974	0.221835	1.14763	1.30253	1.74638	0.690514	15.1525	101.144					9m	95485	0.876552
MG Harv For int	10	12.25	1.7	150	14.16	0.725264	0.153283	180.339	28.56	1	3.3326			1.17037	0.211348	1.134	1.27399	1.8005	0.632135	18.7578	108.79					10m	129562	1.18938
MG Harv For int	11	13.17	3.06	174.895	59	0.765726	0.192411	192.096	51.25	1	4.47195			1.10853	0.25128	1.18942	1.39081	1.63778	0.649374	21.6811	133.921					11m	117465	1.07833
MG Harv For int	12	12.67		221.122	66.81	0.787094	0.17	166.865	53.16	1	5.15207			1.07843	0.215984	1.13995	1.28642	1.71555	0.643969	20.0661	174.044					12m	89035	0.817341
MG Harv For int	13	12.47	4.12	171.278	71.61	0.766122	0.190953	167.61	35.996	1	4.20158			1.10795	0.249246	1.18637	1.38432	1.64327	0.632649	19.4376	131.22					13m	97774	0.897565
MG Harv For int	14	13.41	2.67	134.111	20.42	0.725533	0.272954	155.482	34.89	1	3.08375			1.16994	0.376212	1.42461	1.90931	1.3147	0.455132	22.4785	97.302					14m	321963	0.712955
MG Harv For int	15	13.59	3.09	179.062	56.81	0.580755	0.1375	158.622	44.49	1	1.53623			1.46159	0.236761	1.16817	1.34576	1.94211	0.289675	23.086	103.992					15m	158632	0.819334
MG Harv For int	16	11.74	3.29	195.5	57.95	0.46985	0.0995	180.306	61.4	1	1.14343			1.80659	0.21177	1.13454	1.27511	2.29823	0.288797	17.2285	91.8557					16m	120072	1.10226
MG Harv For int	17	11.76	3.16	245.214	104.81	0.503622	0.1335	196.831	68.54	1	2.08109			1.68544	0.26508	1.2108	1.43642	1.99927	0.360984	17.2872	123.495					17m	73955	0.678907
MG Harv For int	17.4	10.06	1.9	150		0.487091	0.1025	141.299	42.46	1	1.04552			1.74264	0.210433	1.13285	1.27157	2.25319	0.331256	12.6505	73.0637
MG Harv For int	17.7m										#DIV/0!			#DIV/0!	#DIV/0!	#DIV/0!	#DIV/0!	#DIV/0!	#DIV/0!	0	0
