# Supplementary material for: Testing the Münch hypothesis of long distance phloem transport in plants
Source: eLife. 2016 Jun 2;5:e15341. doi: 10.7554/eLife.15341 (PMC4946904; doi:10.7554/eLife.15341)
Supplement: Figure 5—source data 1. — DOI: http://dx.doi.org/10.7554/eLife.15341.020 [file elife-15341-fig5-data1.xlsx]

## Sheet: 2014_07_18_SievePlateData.csv
																										PI
																										3.14159
Large foliated morning glory
ID	location on axis (m)	SE RADIUS	SE RADIUS ERROR	SE LENGTH	SE LENGTH ERROR	PORE RADIUS	PORE RADIUS ERROR	SIEVE PORE NO	PLATE THICKNESS	CONDUCTIVITY (Eq. 27 or 31)					Pore parameter A	Pore parameter B	Pore parameter M3	Pore Parameter M4	Pore parameter 1/IAB	Covering fraction N rp^2/r^2	Lumen conductivity r^2/8	rp*l
	location (m)																								conducting area	location (m)	pixel
MG Pullman 2	0	11.4	3.39	233	53	0.6075	0.168994	130	1	2.64584					1.39725	0.278179	1.23215	1.48227	1.75423	0.36917	16.245	141.548			MG Pullman 2	0	476518	4.37444
ext	1.5	13.2	2.68	230	54	0.685	0.1581	154	1	3.28015					1.23916	0.230803	1.15981	1.32813	1.79522	0.414719	21.78	157.55			ext	1.5	376299	3.45442
	4.5	12.58	2.85	233	29	0.6525	0.153758	143	1	2.89996					1.30088	0.235644	1.16658	1.34242	1.82626	0.384712	19.7821	152.032				5	471041	4.32416
	7.5	14.96	3.12	243	58	0.67	0.135257	185	1	3.00366					1.26691	0.201877	1.12226	1.24951	1.90498	0.371072	27.9752	162.81				7.5	414807	3.80793
	10.5	17.3	3.57	258	52	0.685	0.129335	209	1	2.94658					1.23916	0.18881	1.10695	1.21771	1.92101	0.327669	37.4113	176.73				10	545689	5.00943
	13	9.72	1.76	194	42	0.58	0.13	122	1	2.13756					1.46349	0.224138	1.15071	1.309	1.98705	0.434393	11.8098	112.52				13	187218	1.71866
																										location (m)	pixel
MG Pullman 2	0	11.9	0	91	17	0.6915	0.188301	115	1	1.43683					1.22752	0.272308	1.22245	1.4614	1.65798	0.388319	17.7013	62.9265			MG Pullman 2	0	27526	0.252689
int	1.5	12.7	0	193	41	0.735	0.17695	108	1	2.76032					1.15487	0.240748	1.17388	1.35784	1.7024	0.361735	20.1612	141.855			int	1.5	64393	0.591128
	4.5	14.91	0	138	29	0.834	0.143267	127	1	2.4807					1.01778	0.171783	1.08853	1.17967	1.78144	0.397357	27.7885	115.092				5	131219	1.20459
	7.5	15.56	0	181	51	0.62	0.126672	159	1	1.44626					1.36908	0.20431	1.12523	1.25568	1.97901	0.252442	30.2642	112.22				7.5	207766	1.90729
	10.5	20	0	178	32	0.725	0.14137	166	1	1.566					1.1708	0.194994	1.11407	1.23247	1.84757	0.218134	50	129.05				10	351323	3.22515
																										13	218227	2.00332
